# Supplementary material
Source: Springer Nature journal article supplement (https://mijn.bsl.nl/resource/supplementary/13047_2014_752_MOESM1_ESM.pdf/7113122)

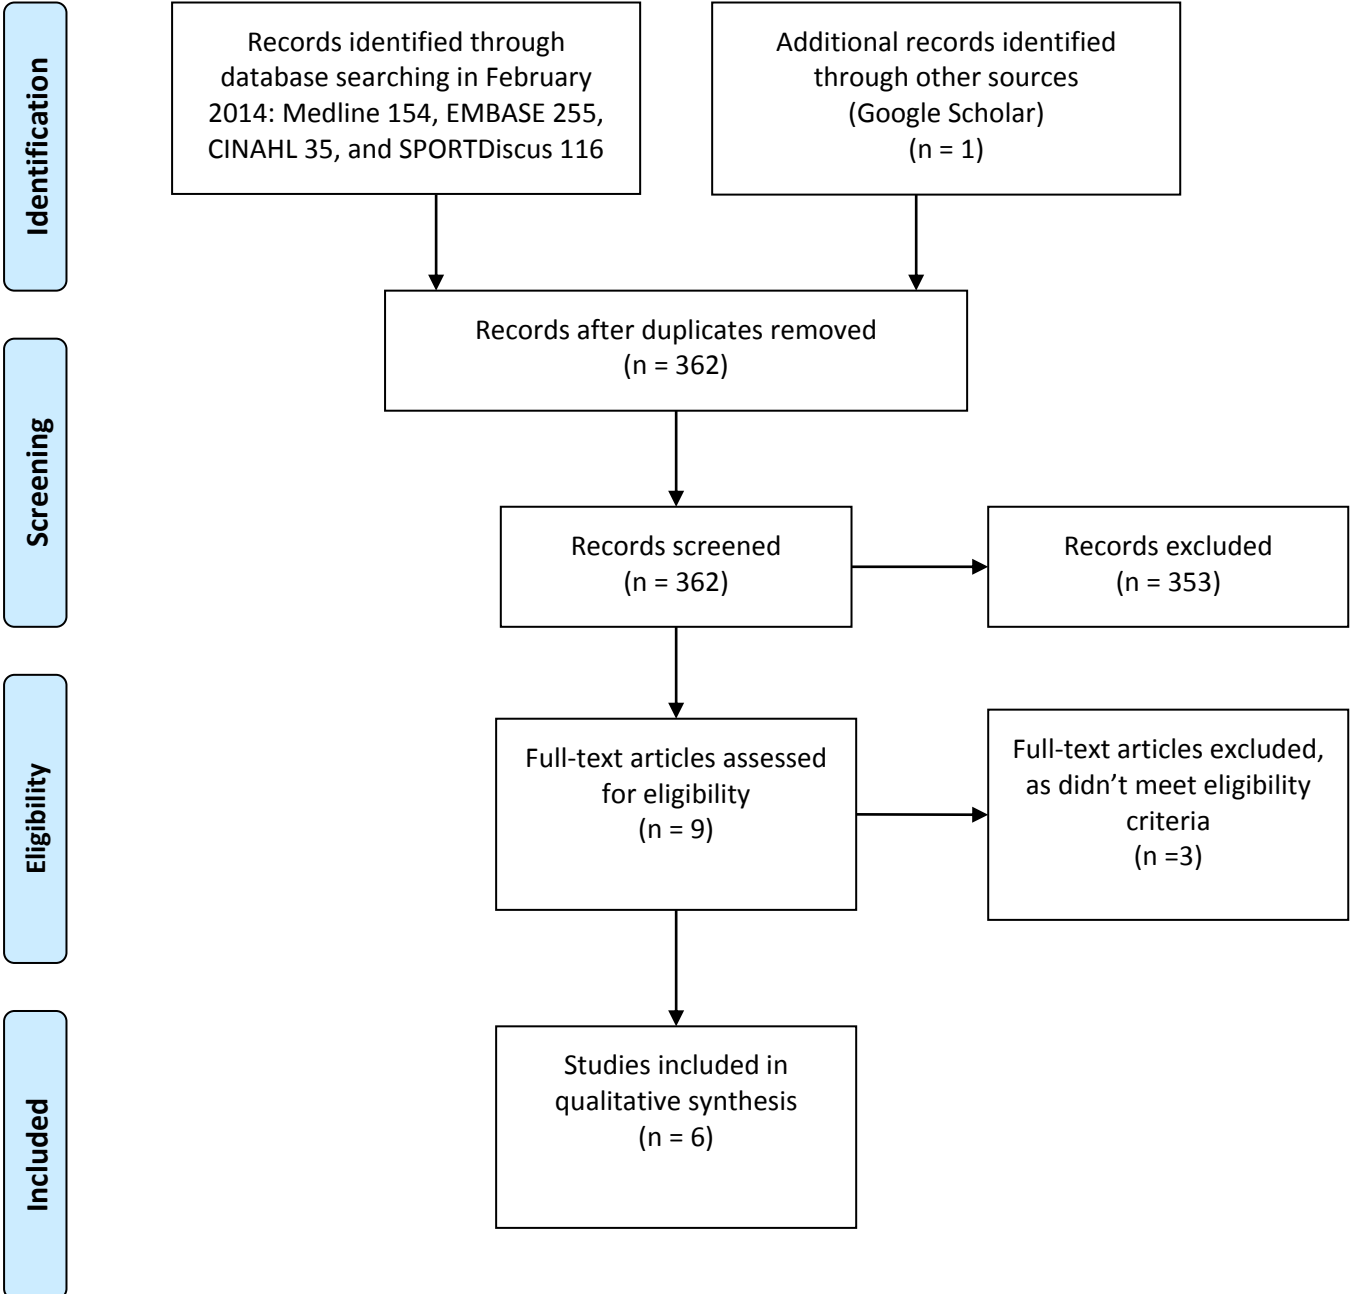

Supplement: MOESM1 [file 7113122]
